# Supplementary material
Source: Springer Nature journal article supplement (https://www.springermedizin.de/resource/supplementary/13075_2009_2819_MOESM2_ESM.pdf/9692954)

**A**

Abatacept clinical trial program vs

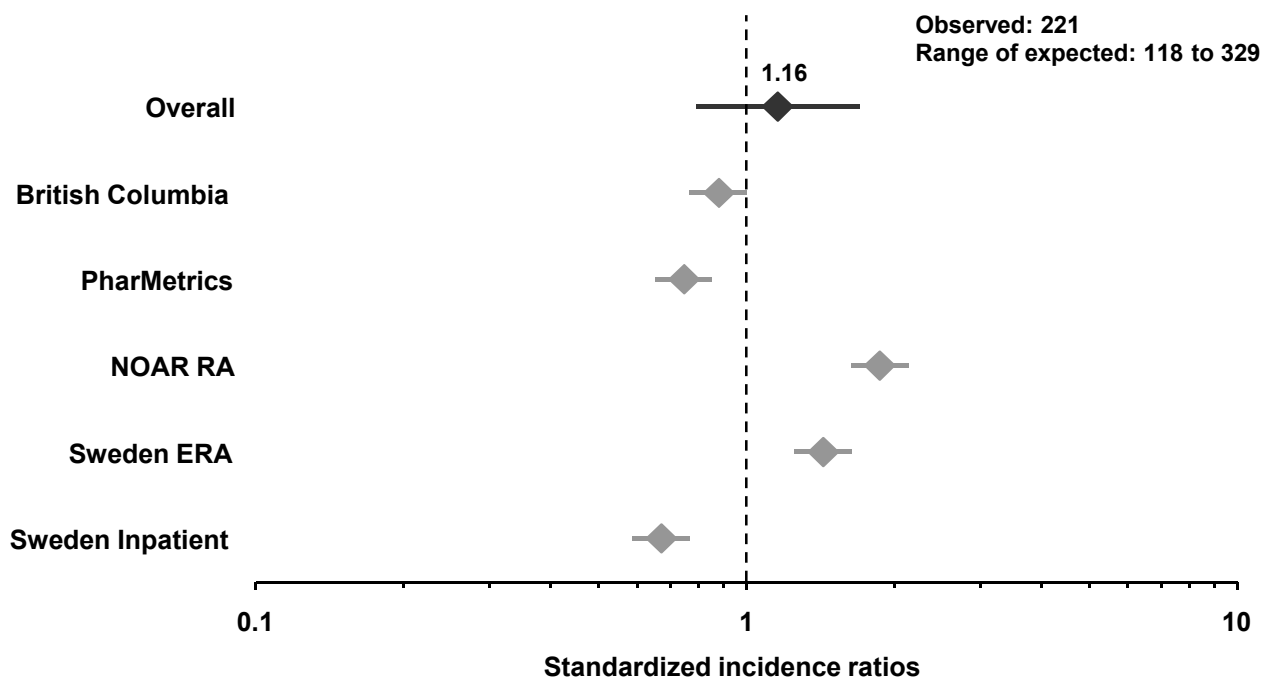**B**

Abatacept clinical trial program vs

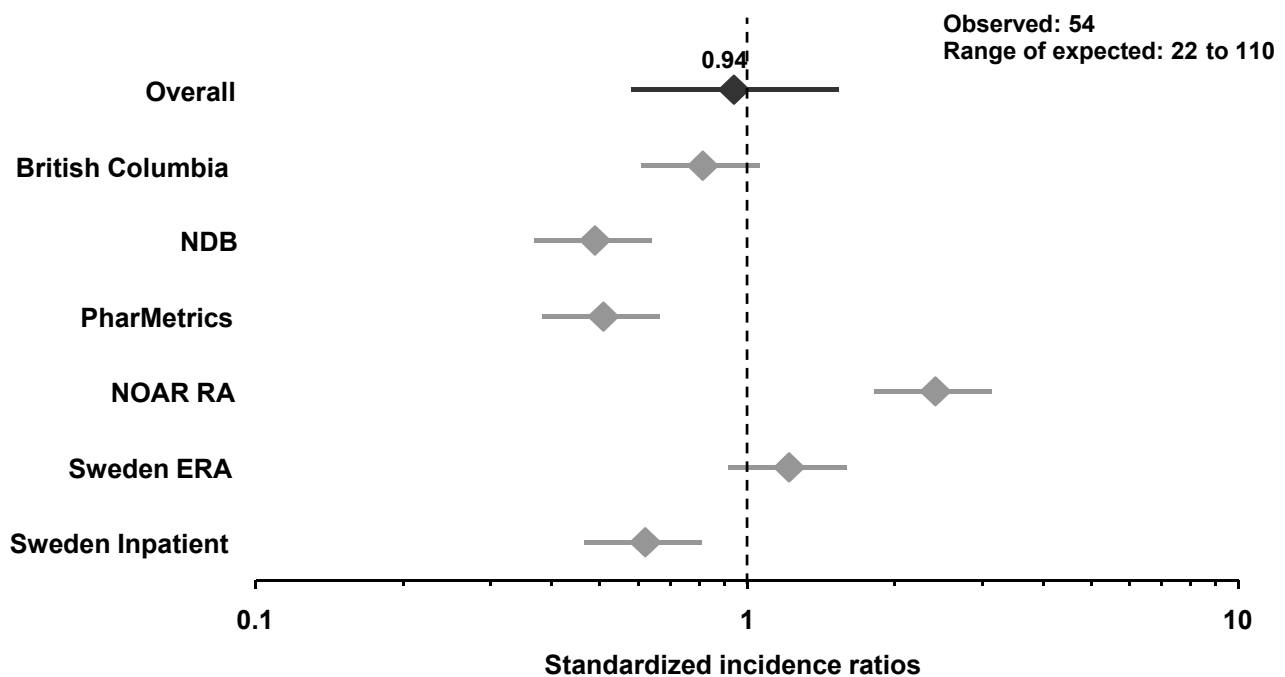

Supplement: MOESM2 [file 9692954]
